# Supplementary material
Source: PubMed Central journal article supplement (PMC6852663)

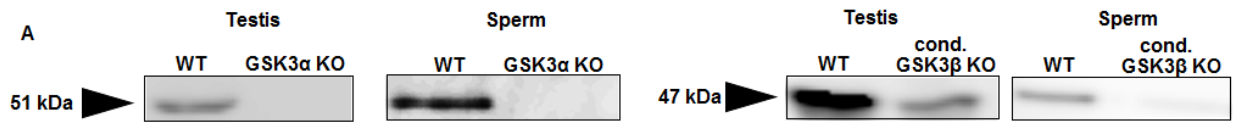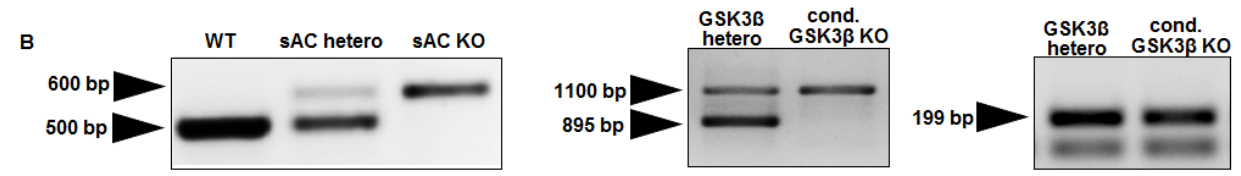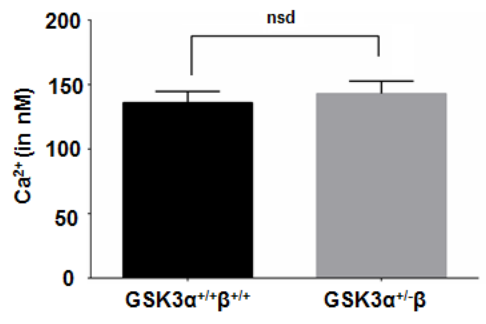

Supplement: NIHMS1058152-supplement-supplemental.pdf [file NIHMS1058152-supplement-supplemental.pdf]
